# Supplementary material
Source: MDPI journal article supplement (https://www.mdpi.com/2073-4344/13/3/586)
Supplement: s1 [file s1]

# Construction of NiFe-Layered Double Hydroxides Arrays as Robust Electrocatalyst for Oxygen Evolution Reaction

Qiyu Liu<sup>1,2</sup>, Yi Wang<sup>1,\*</sup> and Xihong Lu<sup>2,\*</sup>

<sup>1</sup> College of Chemistry and Material Engineering, Guiyang University, Guiyang 550005, China

<sup>2</sup> The Key Lab of Low-Carbon Chem & Energy Conservation of Guangdong Province, School of Chemistry, Sun Yat-Sen University, Guangzhou 510275, China

\* Correspondence: wy742011@hotmail.com (Y.W.); luxh6@mail.sysu.edu.cn (X.L.)

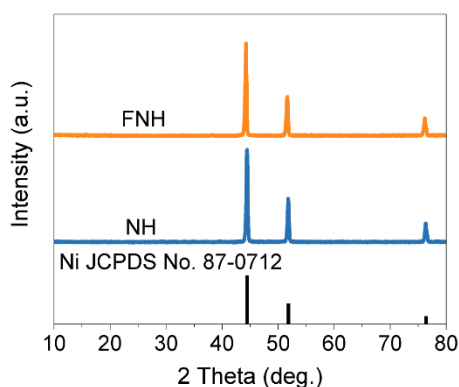

**Figure S1.** XRD patterns NH and FNH catalyst on NF substrate.

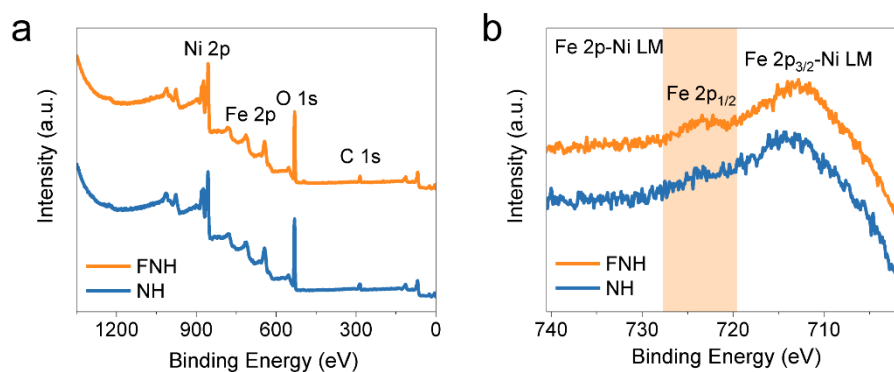

**Figure S2.** (a) XPS survey spectra and (b) Fe 2p-Ni LM spectra of NH and FNH on NF substrate.

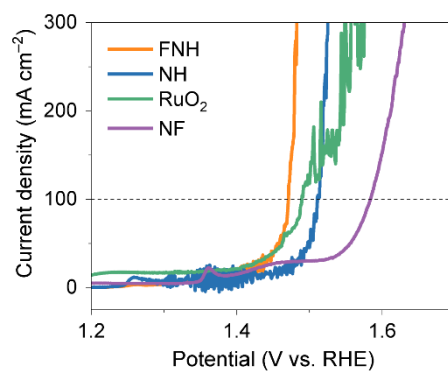

**Figure S3.** LSV polarization curves at 5 mV s<sup>-1</sup> with iR-correction of the as-prepared catalysts.

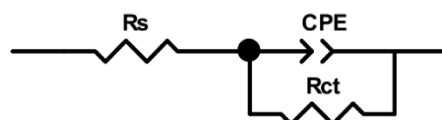

**Figure S4.** The equivalent circuit for modeling the measured electrochemical response.

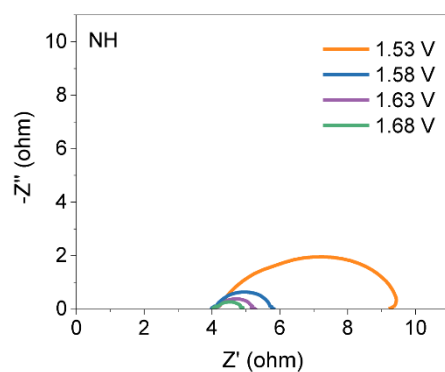

**Figure S5.** Nyquist plots of NH at different applied potentials.

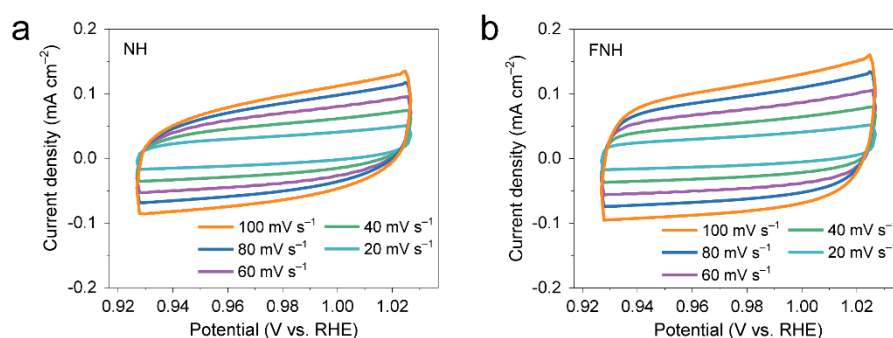

**Figure S6.** The CV curves of NH and FNH at the scan rates of 20-100 mV s<sup>-1</sup>.

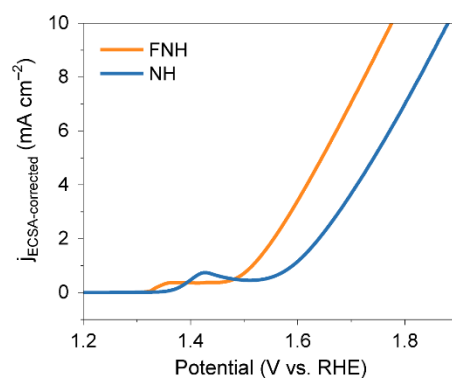

**Figure S7.** The ECSA-corrected LSV curves of NH and FNH catalysts.

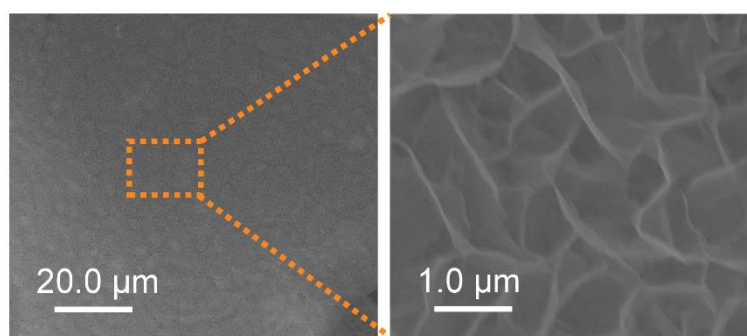

**Figure S8.** SEM images of FNH catalyst after continuous operation for 28 h.

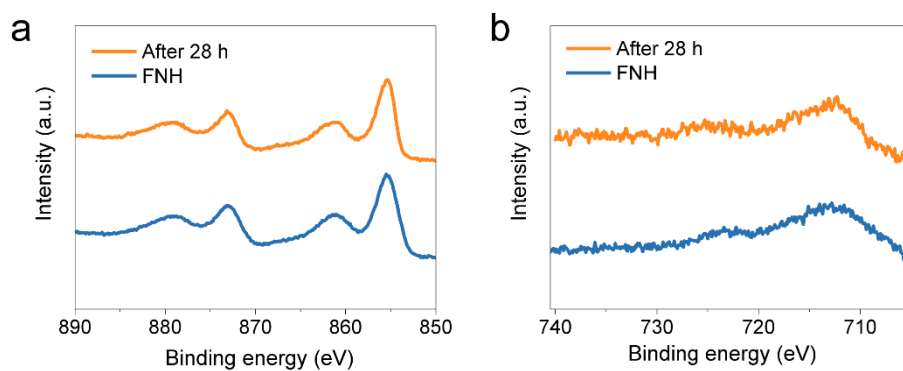

**Figure S9.** (a) Ni 2p and (b) Fe 2p-Ni LM spectra of FNH catalyst before and after continuous operation for 28 h.
